# Supplementary material for: The Professional Culture of Community Pharmacy and the Provision of MTM Services
Source: PubMed Central journal article supplement (PMC6025126; doi:10.3390/pharmacy6020025), 2018-03-21
Supplement: pharmacy-06-00025-s001.pdf [file pharmacy-06-00025-s001.pdf]

## Professional culture survey

By checking this box I certify that I am 18 years of age or older

**Investigator:**

Meagen Rosenthal, PhD  
Department of Pharmacy Administration  
University of Mississippi  
mmrosent@olemiss.edu  
(662) 915-2475

**Description:**

The purpose of this research project is to gain insight into the professional culture of pharmacy, and how that culture may influence pharmacists' decisions to provide additional clinical services to their patients. We would like to ask you a few questions about your ideas about pharmacists' professional culture, and your intention to provide clinical services to patients. You will not be asked for your name, or any other identifying information.

**Risks and Benefits:**

You may feel uncomfortable with the length of time needed to complete the survey. We do not think that there are any other risks.

**Confidentiality:**

No identifiable information will be recorded, therefore, we do not think that you can be identified from this study.

**Right to Withdraw:**

You do not have to take part in this study and you may stop participation at any time up until you submit the survey. You may skip any questions you prefer not to answer. However, please note once you have submitted the survey we have no way of removing your responses, because we are not collecting any identifying information. If you have any questions regarding this please contact Dr. Meagen Rosenthal (contact information above).

**IRB Approval:**

This study has been reviewed by the University of Mississippi's Institutional Review Board (IRB). The IRB has determined that this study fulfills the human research subject protections obligations required by state and federal law and University policies. If you have any questions, concerns, or reports regarding your rights as a participant of research, please contact the IRB at (662) 915-7482.

**Statement of Consent:**

I have read and understand the above information. By completing the survey I consent to participate in the study.

## Background questions

**In what year did you become a licensed pharmacist?**

**Please indicate your educational achievements (please check all that apply):**

- BSc Pharm
- Pharm D
- MSc Pharm
- Pharmacy Residency

**Thinking about your student training please rank from 1 (most) to 5 (least) the time you spent in each setting:**

- Community pharmacy chain store
- Community pharmacy independent store
- Ambulatory pharmacy
- Institutional pharmacy
- Specialty pharmacy

**Please indicate your current pharmacy practice setting:**

- Community pharmacy chain store
- Community pharmacy independent store

**In the past month how many medication reviews have you completed?****If you haven't provided any medication reviews in the past month, please select the most significant barrier to providing medication reviews?**

- Time - my store is too busy to spend the required time with patients
- Training - I would need further education before I could confidently conduct medication reviews
- Patients - my patients are not interested in receiving this kind of service
- Organization - my organization doesn't support providing medication reviews

**In the past month how many immunizations have you provided?****If you haven't provided any immunizations in the past month, please select the most significant barrier to providing immunizations?**

Season - we only provide flu vaccinations

- Time - my store is too busy to spend the required time with patients
- Training - I would need further education before I could confidently provide immunizations
- Patients - my patients are not interested in receiving this kind of service
- Organization - my organization doesn't support providing immunizations

**In the past month how many disease management consultations have you provided?**

**If you haven't provided any disease management consultations in the past month, please select the most significant barrier to providing disease management consultations?**

- Time - my store is too busy to spend the required time with patients
- Training - I would need further education before I could confidently provide disease management consultations
- Patients - my patients are not interested in receiving this kind of service
- Organization - my organization doesn't support providing disease management consultations

### Professional culture:

**In this section we are interested in your perception of the profession of pharmacy. For each of the following items please rate,**

**"To what extent is pharmacy recognized for its..."**

|                                                       | Not at all            | Minimally             | Moderately            | Considerably          | Very much             |
|-------------------------------------------------------|-----------------------|-----------------------|-----------------------|-----------------------|-----------------------|
| <b>Adaptability</b>                                   | <input type="radio"/> | <input type="radio"/> | <input type="radio"/> | <input type="radio"/> | <input type="radio"/> |
| <b>Stability</b>                                      | <input type="radio"/> | <input type="radio"/> | <input type="radio"/> | <input type="radio"/> | <input type="radio"/> |
| <b>Being reflective</b>                               | <input type="radio"/> | <input type="radio"/> | <input type="radio"/> | <input type="radio"/> | <input type="radio"/> |
| <b>Being innovative</b>                               | <input type="radio"/> | <input type="radio"/> | <input type="radio"/> | <input type="radio"/> | <input type="radio"/> |
| <b>Being quick to take advantage of opportunities</b> | <input type="radio"/> | <input type="radio"/> | <input type="radio"/> | <input type="radio"/> | <input type="radio"/> |
| <b>Taking individual responsibility</b>               | <input type="radio"/> | <input type="radio"/> | <input type="radio"/> | <input type="radio"/> | <input type="radio"/> |
| <b>Risk taking</b>                                    | <input type="radio"/> | <input type="radio"/> | <input type="radio"/> | <input type="radio"/> | <input type="radio"/> |
| <b>Opportunities for professional growth</b>          | <input type="radio"/> | <input type="radio"/> | <input type="radio"/> | <input type="radio"/> | <input type="radio"/> |
|                                                       | Not at all            | Minimally             | Moderately            | Considerably          | Very much             |
| <b>Autonomy</b>                                       | <input type="radio"/> | <input type="radio"/> | <input type="radio"/> | <input type="radio"/> | <input type="radio"/> |
| <b>Being rule oriented</b>                            | <input type="radio"/> | <input type="radio"/> | <input type="radio"/> | <input type="radio"/> | <input type="radio"/> |

|                                                |                       |                       |                       |                       |                       |
|------------------------------------------------|-----------------------|-----------------------|-----------------------|-----------------------|-----------------------|
| <b>Being analytical</b>                        | <input type="radio"/> | <input type="radio"/> | <input type="radio"/> | <input type="radio"/> | <input type="radio"/> |
| <b>Paying attention to detail</b>              | <input type="radio"/> | <input type="radio"/> | <input type="radio"/> | <input type="radio"/> | <input type="radio"/> |
| <b>Confronting conflict directly</b>           | <input type="radio"/> | <input type="radio"/> | <input type="radio"/> | <input type="radio"/> | <input type="radio"/> |
| <b>Being team oriented</b>                     | <input type="radio"/> | <input type="radio"/> | <input type="radio"/> | <input type="radio"/> | <input type="radio"/> |
| <b>Sharing information freely</b>              | <input type="radio"/> | <input type="radio"/> | <input type="radio"/> | <input type="radio"/> | <input type="radio"/> |
| <b>Being people oriented</b>                   | <input type="radio"/> | <input type="radio"/> | <input type="radio"/> | <input type="radio"/> | <input type="radio"/> |
|                                                | Not at all            | Minimally             | Moderately            | Considerably          | Very much             |
| <b>Fairness</b>                                | <input type="radio"/> | <input type="radio"/> | <input type="radio"/> | <input type="radio"/> | <input type="radio"/> |
| <b>Not being constrained by many rules</b>     | <input type="radio"/> | <input type="radio"/> | <input type="radio"/> | <input type="radio"/> | <input type="radio"/> |
| <b>Tolerance</b>                               | <input type="radio"/> | <input type="radio"/> | <input type="radio"/> | <input type="radio"/> | <input type="radio"/> |
| <b>Informality</b>                             | <input type="radio"/> | <input type="radio"/> | <input type="radio"/> | <input type="radio"/> | <input type="radio"/> |
| <b>Decisiveness</b>                            | <input type="radio"/> | <input type="radio"/> | <input type="radio"/> | <input type="radio"/> | <input type="radio"/> |
| <b>Being competitive</b>                       | <input type="radio"/> | <input type="radio"/> | <input type="radio"/> | <input type="radio"/> | <input type="radio"/> |
| <b>Being highly organized</b>                  | <input type="radio"/> | <input type="radio"/> | <input type="radio"/> | <input type="radio"/> | <input type="radio"/> |
| <b>Achievement orientation</b>                 | <input type="radio"/> | <input type="radio"/> | <input type="radio"/> | <input type="radio"/> | <input type="radio"/> |
|                                                | Not at all            | Minimally             | Moderately            | Considerably          | Very much             |
| <b>Having a clear guiding philosophy</b>       | <input type="radio"/> | <input type="radio"/> | <input type="radio"/> | <input type="radio"/> | <input type="radio"/> |
| <b>Being results oriented</b>                  | <input type="radio"/> | <input type="radio"/> | <input type="radio"/> | <input type="radio"/> | <input type="radio"/> |
| <b>Having high performance expectations</b>    | <input type="radio"/> | <input type="radio"/> | <input type="radio"/> | <input type="radio"/> | <input type="radio"/> |
| <b>Being aggressive</b>                        | <input type="radio"/> | <input type="radio"/> | <input type="radio"/> | <input type="radio"/> | <input type="radio"/> |
| <b>High pay for good performance</b>           | <input type="radio"/> | <input type="radio"/> | <input type="radio"/> | <input type="radio"/> | <input type="radio"/> |
| <b>Security of employment</b>                  | <input type="radio"/> | <input type="radio"/> | <input type="radio"/> | <input type="radio"/> | <input type="radio"/> |
| <b>Offers of praise for good performance</b>   | <input type="radio"/> | <input type="radio"/> | <input type="radio"/> | <input type="radio"/> | <input type="radio"/> |
| <b>Being supportive</b>                        | <input type="radio"/> | <input type="radio"/> | <input type="radio"/> | <input type="radio"/> | <input type="radio"/> |
|                                                | Not at all            | Minimally             | Moderately            | Considerably          | Very much             |
| <b>Being calm</b>                              | <input type="radio"/> | <input type="radio"/> | <input type="radio"/> | <input type="radio"/> | <input type="radio"/> |
| <b>Developing friends at work</b>              | <input type="radio"/> | <input type="radio"/> | <input type="radio"/> | <input type="radio"/> | <input type="radio"/> |
| <b>Being socially responsible</b>              | <input type="radio"/> | <input type="radio"/> | <input type="radio"/> | <input type="radio"/> | <input type="radio"/> |
| <b>Enthusiasm for the job</b>                  | <input type="radio"/> | <input type="radio"/> | <input type="radio"/> | <input type="radio"/> | <input type="radio"/> |
| <b>Working long hours</b>                      | <input type="radio"/> | <input type="radio"/> | <input type="radio"/> | <input type="radio"/> | <input type="radio"/> |
| <b>Having a good reputation</b>                | <input type="radio"/> | <input type="radio"/> | <input type="radio"/> | <input type="radio"/> | <input type="radio"/> |
| <b>An emphasis on quality</b>                  | <input type="radio"/> | <input type="radio"/> | <input type="radio"/> | <input type="radio"/> | <input type="radio"/> |
| <b>Being distinctive/different from others</b> | <input type="radio"/> | <input type="radio"/> | <input type="radio"/> | <input type="radio"/> | <input type="radio"/> |
